# Supplementary material for: Kaposi’s sarcoma-associated herpesvirus ORF57 protein protects viral transcripts from specific nuclear RNA decay pathways by preventing hMTR4 recruitment
Source: PLoS Pathog. 2019 Feb 20;15(2):e1007596. doi: 10.1371/journal.ppat.1007596 (PMC6398867; doi:10.1371/journal.ppat.1007596)
Supplement: S2 Table — All templates for in vitro transcription were generated by PCR with a T7 promoter on the reverse primer. The one exception was the ORF47 probe which was made by a cut plasmid as indicated. (XLSX) [file ppat.1007596.s007.xlsx]

## Sheet: Sheet1
Target	Primer ID	Primer Sequence
ORF59	NC570	CGTGACCCTCCTGTCTAAAATCA
	NC474	CGCGTAATACGACTCACTATAGGGtcaaatcagggggttaaatg
ORF47		cut with EcoRI from pcTET-ORF47
PAN	NC749	cgcgtaatacgactcactataggggacaaatgccacctcact
	NC64	TCCTGGGCCCACTGGGACTGCCCAGTCAC
ORF6	NC2121	gcacgggctcacagtggaat
	NC2136	CGCGTAATACGACTCACTATAGGGttccccaatgtgtacgggcg
